# Supplementary material for: Formulation of Gluten-Free Cookies Utilizing Chickpea, Carob, and Hazelnut Flours through Mixture Design
Source: MDPI journal article supplement (doi:10.3390/foods12193689), 2023-10-08
Supplement: s1 [file s1]

**Supplementary material:** Dogruer et al., Formulation of Gluten-Free Cookies Utilizing Chickpea, Carob, and Hazelnut Flours Through Mixture Design

**Table S1.** Statistical parameters of simplex-centroid mixture design models for the rheological properties of the cookie doughs obtained from analysis of variance\*

| Response        | Model**                                                                                     | R <sup>2</sup> | R <sup>2</sup> adj | p model |
|-----------------|---------------------------------------------------------------------------------------------|----------------|--------------------|---------|
| Consistency     | $0.533x_1 + 0.743x_2 + 0.058x_3 - 0.026x_1x_2 - 0.006x_1x_3 - 0.024x_2x_3 + 0.001x_1x_2x_3$ | 94.3           | 92.5               | 0.000   |
| Firmness        | $0.153x_1 + 0.222x_2 + 0.008x_3 - 0.007x_1x_2 - 0.001x_1x_3 - 0.007x_2x_3$                  | 96.7           | 95.6               | 0.000   |
| Viscosity index | $0.066x_1 + 0.124x_2 - 0.001x_3 - 0.003x_1x_2 - 0.004x_1x_3$                                | 94.5           | 92.8               | 0.000   |
| Cohesiveness    | $0.067x_1 + 0.117x_2 - 0.01x_3 - 0.003x_1x_2 + 0.001x_1x_3 - 0.003x_2x_3$                   | 94.8           | 93.2               | 0.000   |

\* It's not possible to calculate the lack-of-fit test for this particular design because mixture model has already utilized all the available degrees of freedom.

\* x<sub>1</sub>: chickpea flour; x<sub>2</sub>: carob flour; x<sub>3</sub>: hazelnut flour

**Table S2.** Statistical parameters of simplex-centroid mixture design models for the technological properties of the baked cookies obtained from analysis of variance

| Response           | Model*                                                                   | R <sup>2</sup> | R <sup>2</sup> adj | p model | p lack of fit |
|--------------------|--------------------------------------------------------------------------|----------------|--------------------|---------|---------------|
| Moisture           | $0.022x_1 + 0.122x_2 + 0.049x_3 + 0.002x_1x_2 + 0.002x_1x_3$             | 61.9           | 58.8               | 0.000   | 0.1           |
| Baking weight loss | $0.198x_1 + 0.105x_2 + 0.218x_3 - 0.005x_1x_3 + 0.002x_2x_3$             | 64.2           | 62.7               | 0.000   | 0.000         |
| Spread ratio       | $0.048x_1 + 0.039x_2 + 0.147x_3 - 0.002x_1x_3 - 0.001x_2x_3$             | 95.7           | 95.5               | 0.000   | 0.467         |
| Hardness           | $0.1x_1 + 0.178x_2 + 0.064x_3 - 0.003x_1x_2 - 0.003x_1x_3 - 0.002x_2x_3$ | 71.6           | 70.1               | 0.000   | 0.000         |

\* x<sub>1</sub>: chickpea flour; x<sub>2</sub>: carob flour; x<sub>3</sub>: hazelnut flour
